# Supplementary material for: Distinct Susceptibility Patterns of Active and Relict Landslides Reveal Distinct Triggers: A Case in Northwestern Turkey
Source: MDPI journal article supplement (doi:10.3390/rs14061321), 2022-03-09
Supplement: s1 [file s1]

Supplementary file

# Distinct Susceptibility Patterns of Active and Relict Landslides Reveal Distinct Triggers: A Case in Northwestern Turkey

Marco Loche <sup>1</sup>, Luigi Lombardo <sup>2</sup>, Tolga Gorum <sup>3</sup>, Hakan Tanyas <sup>2</sup>, Gianvito Scaringi <sup>1, \*</sup>

<sup>1</sup> Institute of Hydrogeology, Engineering Geology and Applied Geophysics, Faculty of Science, Charles University, 12843 Prague, Czech Republic; marco.loche@natur.cuni.cz (M.L.); gianvito.scaringi@natur.cuni.cz (G.S.)

<sup>2</sup> Faculty of Geo-Information Science and Earth Observation (ITC), University of Twente, 7514 Enschede, The Netherlands; l.lombardo@utwente.nl (L.L.); h.tanyas@utwente.nl (H.T.)

<sup>3</sup> Eurasia Institute of Earth Sciences, Istanbul Technical University, 34469 Istanbul, Turkey; tgorum@itu.edu.tr

\* Correspondence: gianvito.scaringi@natur.cuni.cz

**Citation:** Loche, M.; Lombardo, L.; Gorum, T.; Tanyas, H.; Scaringi, G. Distinct Susceptibility Patterns of Active and Relict Landslides Reveal Distinct Triggers: A Case in Northwestern Turkey. *Remote Sens.* **2022**, *14*, 1321. <https://doi.org/10.3390/rs14061321>

Academic Editor: Stefano Morelli

Received: 25 February 2022

Accepted: 4 March 2022

Published: 9 March 2022

**Publisher's Note:** MDPI stays neutral with regard to jurisdictional claims in published maps and institutional affiliations.

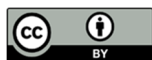

**Copyright:** © 2022 by the authors. Submitted for possible open access publication under the terms and conditions of the Creative Commons Attribution (CC BY) license (<https://creativecommons.org/licenses/by/4.0/>).

**Table S1.** List of lithologies used in the model. For simplicity we merged rocks with similar characteristics [1].

| Name                                                                                    | Abbreviation |
|-----------------------------------------------------------------------------------------|--------------|
| Basalt                                                                                  | BSL          |
| Carbonate rocks and clastic rocks in places;<br>Carbonate and clastic rocks;            | CCR          |
| Carbonate and clastic rocks (continental in<br>places);<br>Clastic and carbonate rocks. | CCRVRP       |
|                                                                                         | CCRF         |
| Clastic and carbonate rocks (blocks and volcanic<br>rocks in places)                    | ContCR       |
| Clastic and carbonate rocks (flysch)                                                    | DRR          |
| Coninental clastic rocks;                                                               | DT           |
| Clastic rocks;                                                                          | GRN          |
| Clastic rocks, carbonate rocks in places;                                               |              |
| Clastic rocks (continental in places);                                                  | LLMS         |
| Continental clastic rocks.                                                              |              |
|                                                                                         | MMR          |
| Dacite, rhyolite, rhyodacite                                                            |              |
|                                                                                         | ML           |
| Diorite, tonalite                                                                       |              |
|                                                                                         | NL           |
| Granitoids                                                                              |              |
|                                                                                         | OM           |
| Lacustrine limestone, marn, shale                                                       |              |
|                                                                                         | PL           |
| Metaclastic and metacarbonate rocks                                                     | PR           |
| Metaultrabasic rocks                                                                    | UP           |
| Neritic limestone                                                                       | UGMSMMA      |
| Ophiolitic melange                                                                      | UBUR         |
| Pelagic limestone                                                                       | UCCR         |
|                                                                                         | AND          |
| Pyroclastic rocks                                                                       |              |
|                                                                                         | SPM          |
| Undifferentiated andesite, pyroclastics etc;                                            | SCT          |
| Pillow lava and sedimentary rocks                                                       | UVR          |
|                                                                                         | BSL          |
|                                                                                         | CCR          |
| Undifferentiated gneiss, metagranite, schist,<br>marble, amphibolite etc;               |              |
| Undifferentiated gneiss, migmatite, metagranite,<br>schist, amphibolite etc.            | CCRVRP       |

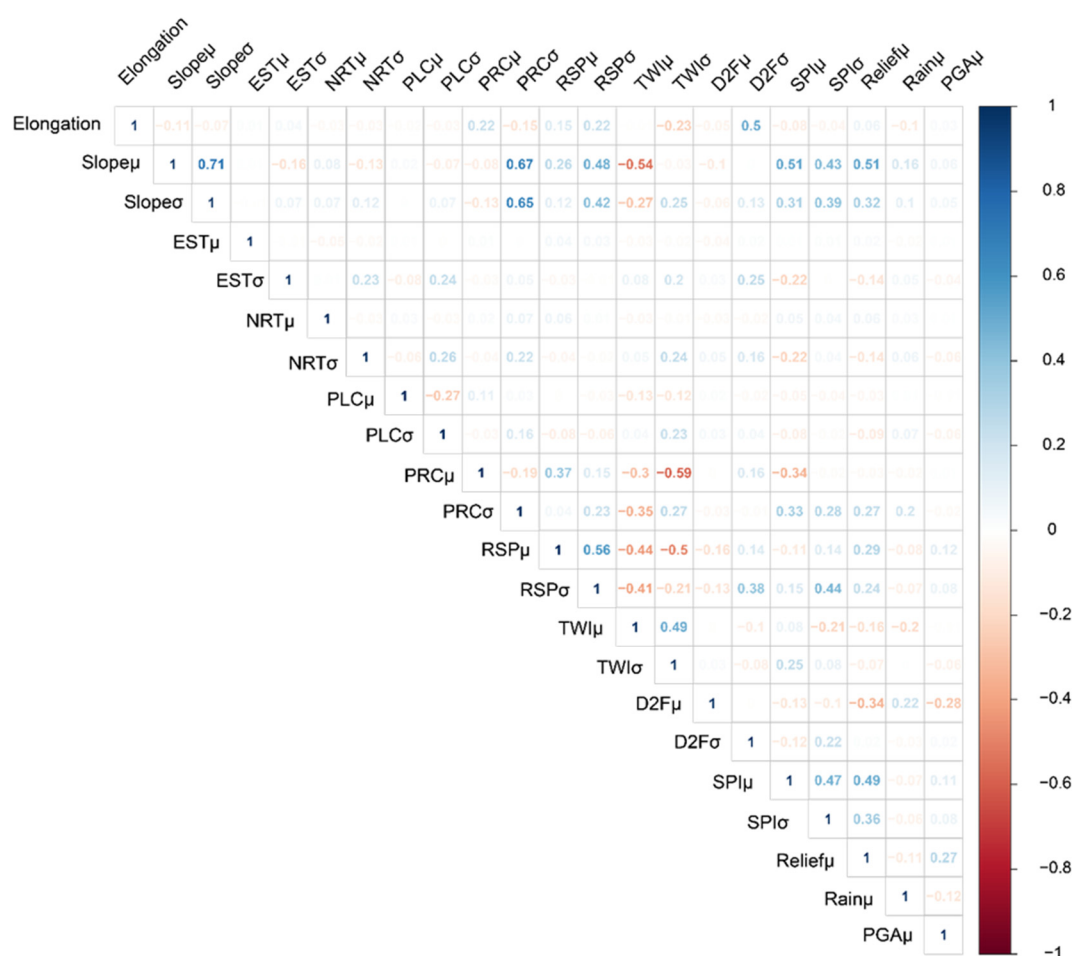

**Figure S1.** Collinearity between the variables used in the model. Note that multicollinearity is a potential problem when the coefficient is greater than 0.75, and a problem when it is greater than 0.9 [2,3].

Lithological responses showed some divergences. For instance, Granitoids (GRN) display a negative correlation for active landslides. This is a reasonable result, given that the inventory is based on slides and shallow failures. Moreover, for the inactive landslide, a positive value indicates that the lithogenic characteristics help the stabilisation.

Also, Carbonate rocks and clastic rocks in places, Carbonate and clastic rocks, Carbonate, and clastic rocks (continental in places) (ContCR), and Clastic and carbonate rocks (CCR), which we decided to merge for convenience, having the same mechanical behaviour, showed a strong positive effect for active landslides, whereas less positivity is observed in inactive phenomena.

Then, Ophiolitic Melange (OM), Pelagic limestones (PL), Neritic limestones (NL), and Schist (SCT), phyllite, marble, meta basic rocks and Marble showed a positive correlation for both the landslide classes.

As in the case of geomorphological covariates, we discarded the lithological units for which there were no significant effects, namely Andesite, Basaltic and Diorite, and Tonalite lithological units.

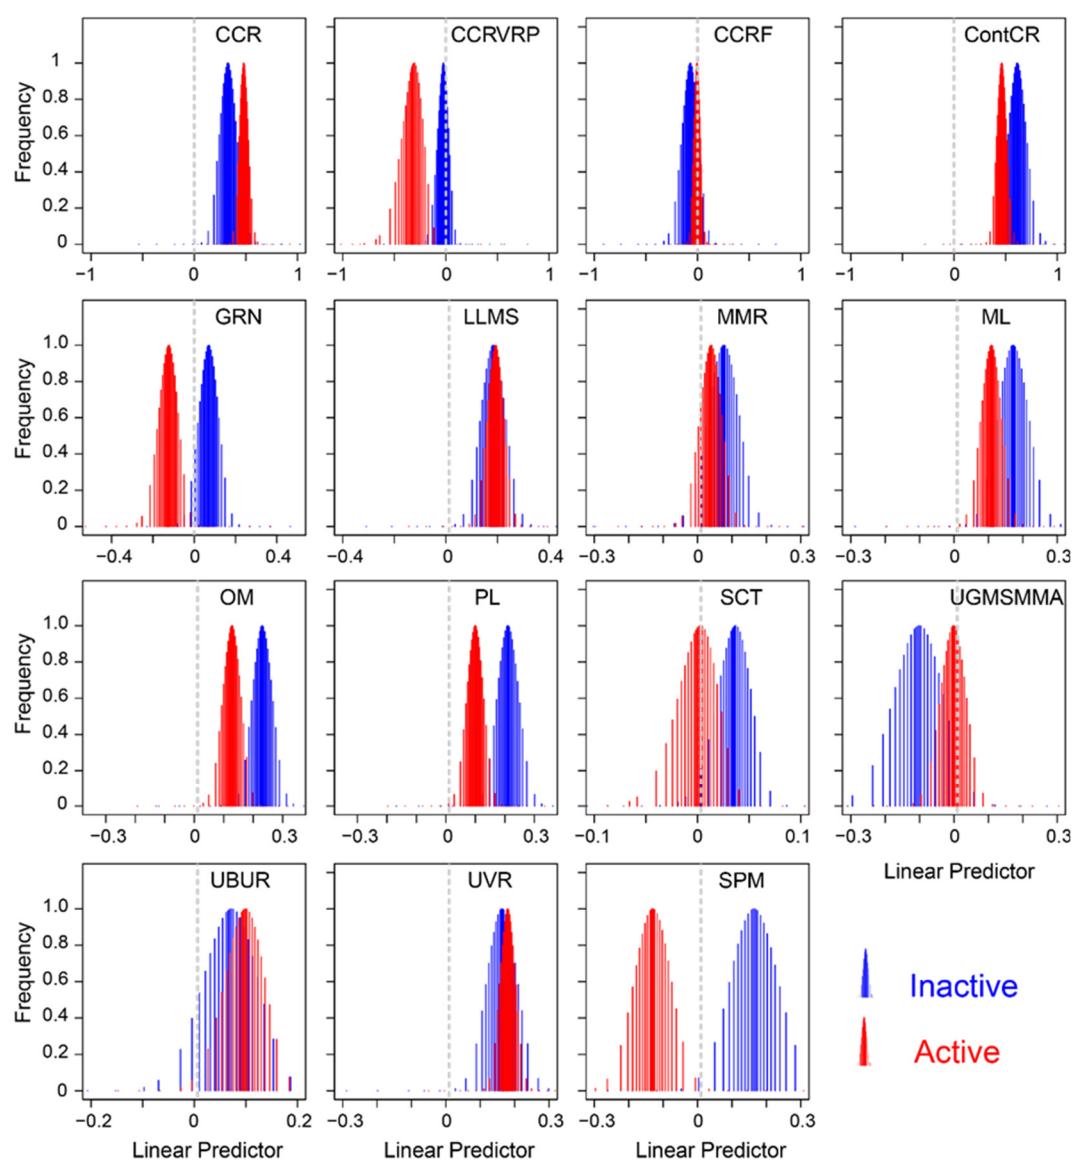

**Figure S2.** Fixed effects expressed as marginal distributions for each lithological unit.

# References

1. Akbaş B.; Akdeniz N.; Aksay A.; Altun İE.; Balcı V.; Bilginer E.; Bilgiç T.; Duru M.; Ercan T.; Gedik İ.; et al. 1:1.250.000 Scaled Geological Map of Turkey. General Directorate of Mineral Research and Exploration. *Publ. Ank.-Turk.* **2011**.
2. Allen The Problem of Multicollinearity. In *Understanding Regression Analysis*; Springer US: Boston, MA, 1997; pp. 176–180 ISBN 978-0-306-45648-0.
3. Mela, C.F.; Kopalle, P.K. The Impact of Collinearity on Regression Analysis: The Asymmetric Effect of Negative and Positive Correlations. *Appl. Econ.* **2002**, *34*, 667–677, doi:10.1080/00036840110058482.
